# Supplementary material for: Isostructural polymorphs of triiodophloroglucinol and triiodoresorcinol
Source: Royal Society of Chemistry journal article supplement (doi:10.1039/b804905j), 2008-01-01
Supplement: b804905j.pdf [file b804905j.pdf]

### Electronic Supplementary Information†

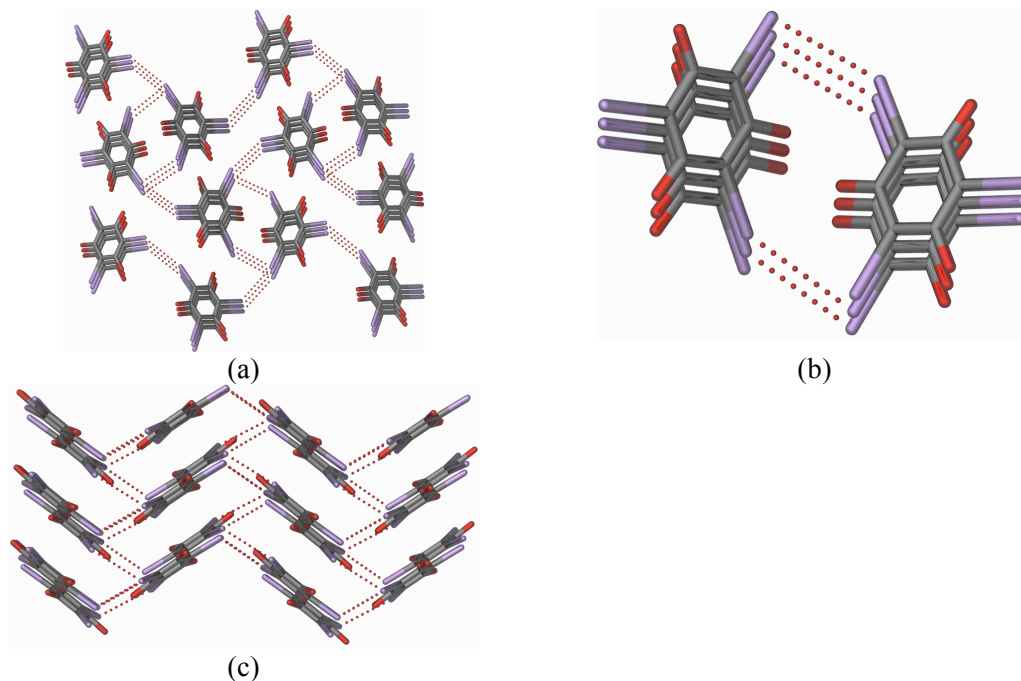

**Figure S1** Solid-solution crystal structure of TIP+TIR-O. (a) Zigzag tapes mediated by I3...I2 (3.94 Å, 159.1°, 109.4°) type-II interaction along [010], (b) left-handed helix along [100] formed by I1...I3 type-II interaction (3.96 Å, 146.3°, 82.0°), and (c) molecule make a corrugated sheet structure in (100) plane.

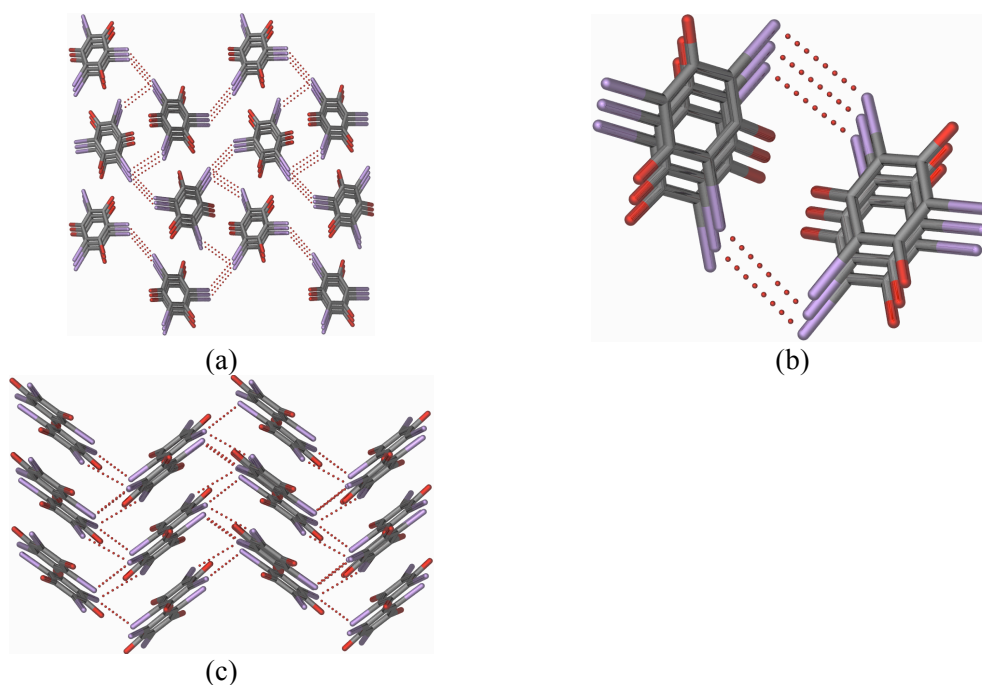

**Figure S2** Packing diagram in solid-solution TIR+TIG-O. (a) Zigzag tapes mediated by I3...I2 type-II interaction (3.77 Å, 164.4°, 104.9°) along [010], (b) right-handed helix formed by I1...I3 (3.89 Å, 146.9°, 82.1°) along [100], and (c) corrugated sheet formed parallel to (100) plane.

**Table S1** Space group and unit cell parameters of some halogen and hydroxyl substituted benzenes. Crystal data are taken from this paper and the Cambridge Structural Database (Version 5.29, November 2007, ConQuest 1.10, January 2008 update).

| Compound/ Space group                                                                                                                                    | <i>a</i> (Å) | <i>b</i> (Å) | <i>c</i> (Å) | $\beta$ (°) | <i>T</i> (K) | <i>V</i> (Å <sup>3</sup> ) |
|----------------------------------------------------------------------------------------------------------------------------------------------------------|--------------|--------------|--------------|-------------|--------------|----------------------------|
| This Paper                                                                                                                                               |              |              |              |             |              |                            |
| 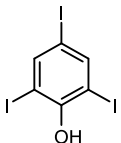<br>TIP ( <i>P</i> 2 <sub>1</sub> 2 <sub>1</sub> 2 <sub>1</sub> )       | 4.370        | 14.694       | 14.184       | 90          | 100          | 910.7                      |
| <br>TIR-O ( <i>P</i> 2 <sub>1</sub> 2 <sub>1</sub> 2 <sub>1</sub> )     | 4.495        | 13.958       | 15.036       | 90          | 100          | 943.3                      |
| <br>TIG-O ( <i>P</i> 2 <sub>1</sub> 2 <sub>1</sub> 2 <sub>1</sub> )     | 4.638        | 13.529       | 15.345       | 90          | 100          | 962.8                      |
| <br>TIP+TIR ( <i>P</i> 2 <sub>1</sub> 2 <sub>1</sub> 2 <sub>1</sub> )  | 4.442        | 14.368       | 14.573       | 90          | 100          | 930.1                      |
| <br>TIR+TIG ( <i>P</i> 2 <sub>1</sub> 2 <sub>1</sub> 2 <sub>1</sub> ) | 4.561        | 13.648       | 15.348       | 90          | 100          | 955.4                      |
| <br>TIR-M ( <i>P</i> 2 <sub>1</sub> / <i>n</i> )                      | 14.882       | 4.332        | 15.585       | 108.49      | 100          | 952.8                      |
| <br>TIG ( <i>P</i> 2 <sub>1</sub> / <i>n</i> )                        | 14.582       | 4.5004       | 15.507       | 107.57      | 100          | 970.2                      |
| Crystal data from CSD                                                                                                                                    |              |              |              |             |              |                            |
| <br>TIB ( <i>P</i> 2 <sub>1</sub> 2 <sub>1</sub> 2 <sub>1</sub> )     | 4.329        | 14.224       | 14.515       | 90          | 161          | 893.7                      |

|                                                                                                                           |        |        |        |        |     |       |
|---------------------------------------------------------------------------------------------------------------------------|--------|--------|--------|--------|-----|-------|
| 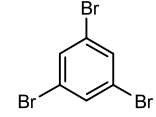 <p>TBB (<math>P_{21}2_12_1</math>)</p>  | 14.23  | 13.55  | 4.08   | 90     | 298 | 786.7 |
|  <p>TCB (<math>P_{21}2_12_1</math>)</p>  | 13.93  | 13.19  | 3.91   | 90     | 298 | 718.4 |
|  <p>TBR (<math>P_{21}2_12_1</math>)</p>  | 4.107  | 12.855 | 15.296 | 90     | 120 | 807.6 |
|  <p>TBA (<math>P_{21}2_12_1</math>)</p>  | 13.44  | 14.62  | 4.26   | 90     | 298 | 837.9 |
|  <p>BCA (<math>P_{21}2_12_1</math>)</p> | 4.178  | 13.24  | 14.86  | 90     | 298 | 822.2 |
|  <p>TIF (<math>P_{21}/n</math>)</p>    | 13.818 | 4.758  | 15.385 | 107.08 | 120 | 966.9 |
